# Supplementary material for: Regulation of murine copper homeostasis by members of the COMMD protein family
Source: PubMed Central journal article supplement (PMC7803461; doi:10.1242/dmm.045963), 2021-01-08
Supplement: dmm-14-045963-s1.pdf [file dmm-14-045963-s1.pdf]

## Figure S1

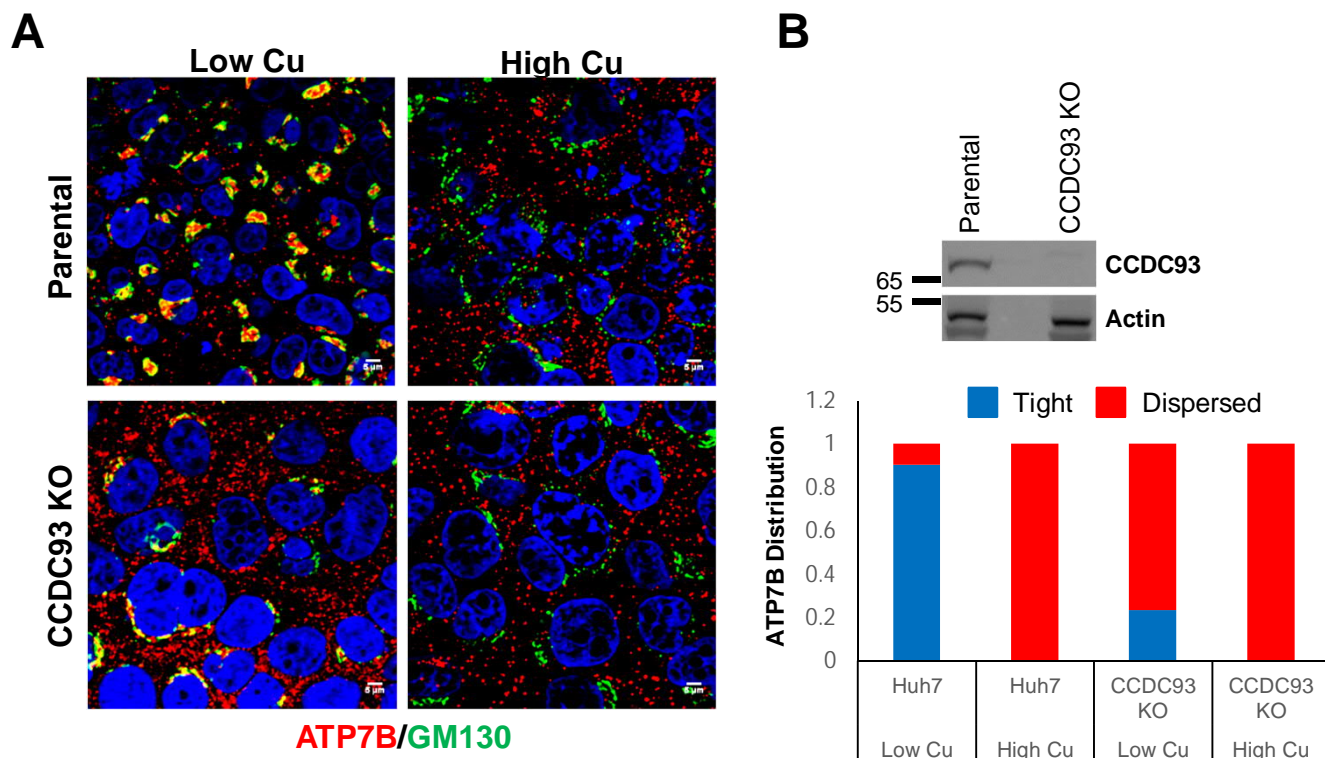

**Figure S1: Depletion of CCDC93 impairs ATP7B trafficking.** (A) Huh-7 parental cells and a CCDC93 knockout sub-line were exposed to high or low copper-containing media. Following this, cells were immunostained for ATP7B (red) and the Golgi marker GM130 (green). A nuclear dye was also used (blue). Immunofluorescence images are shown. Scale bar, 5 $\mu$ m. (B) Immunoblot for CCDC93 and actin (top panel) and quantification of ATP7B distribution pattern in the indicated cell lines.

Figure S2

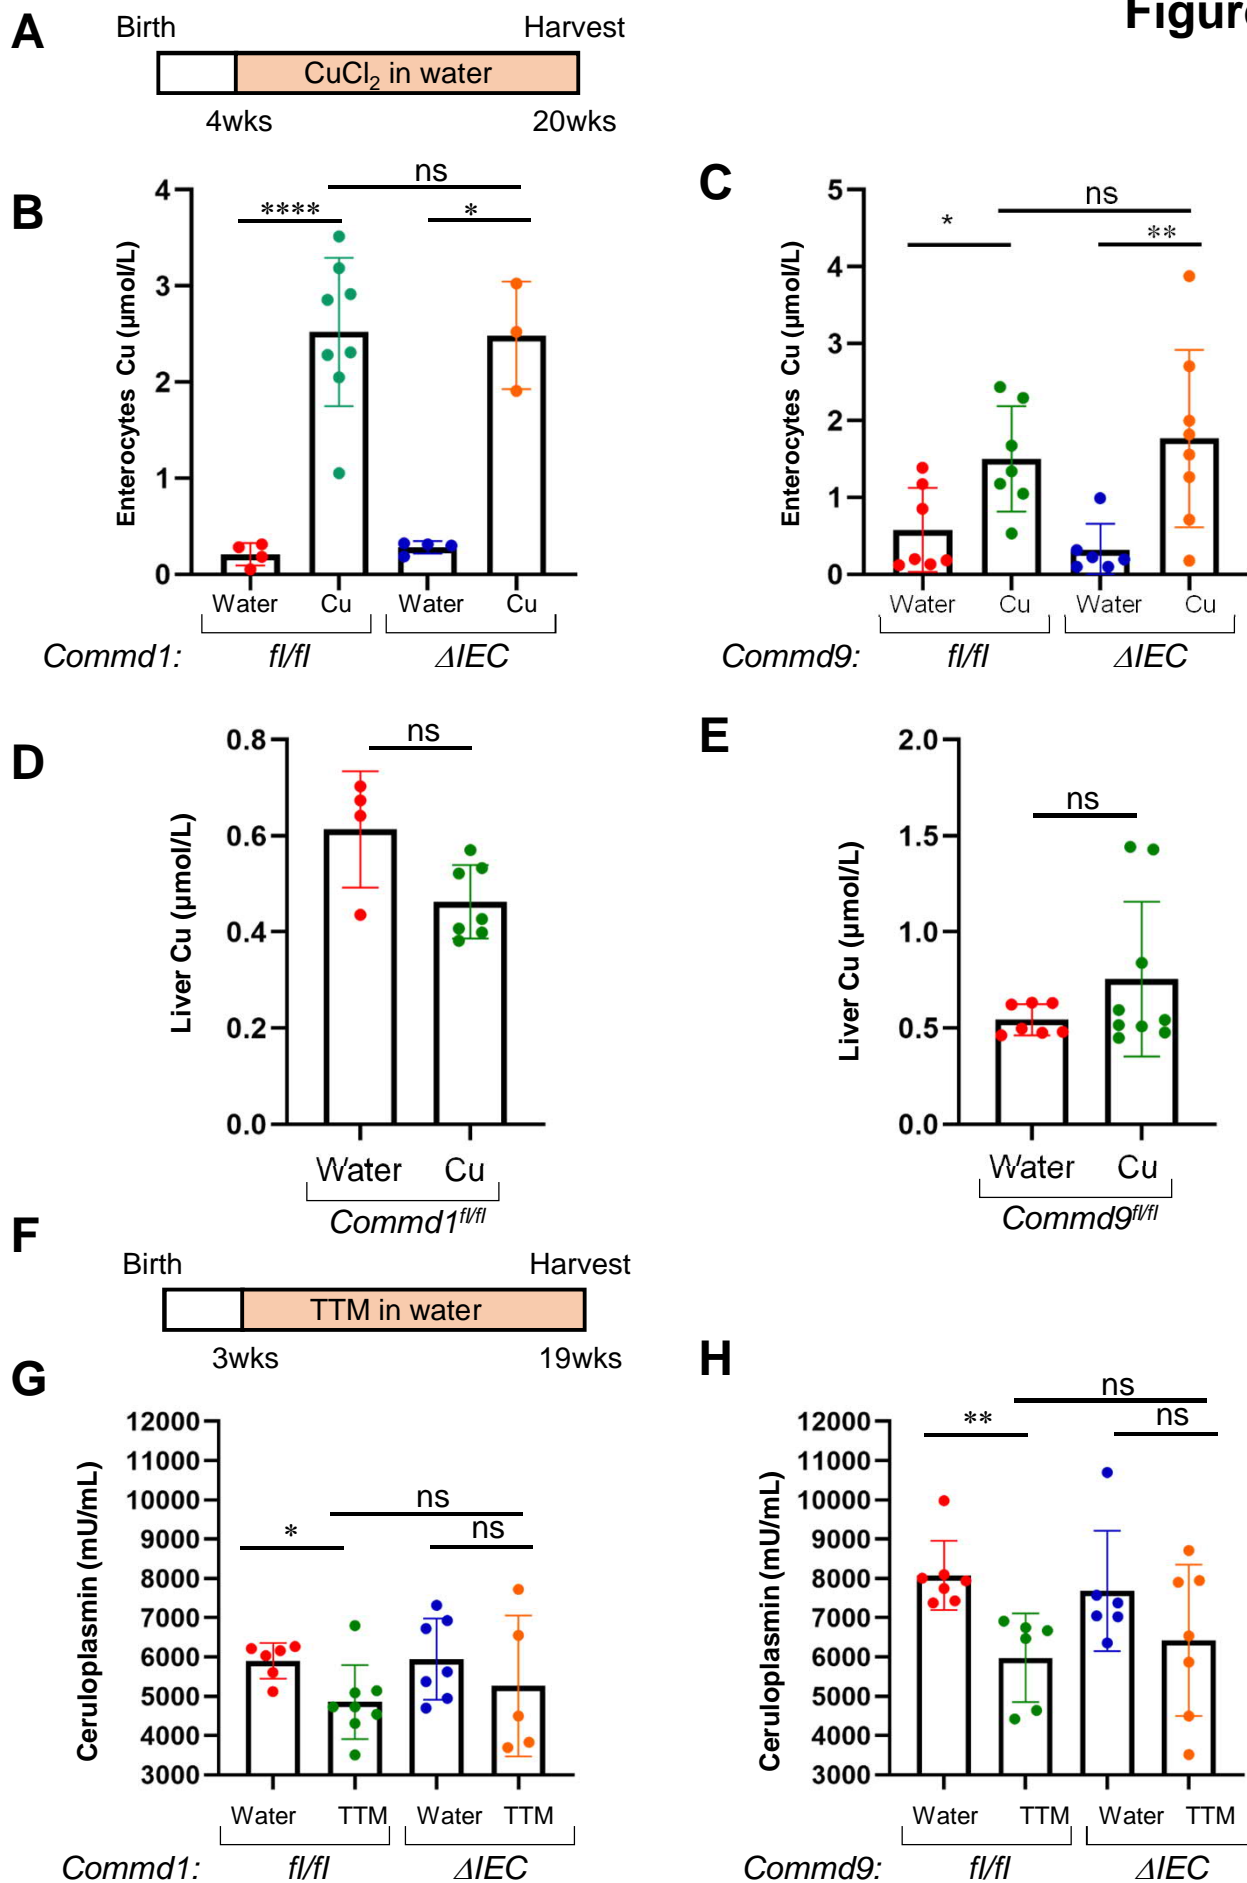

**Figure S2: Enteric *Commd* knockout does not impair copper balance.** (A) Schematic depicting copper treatment course. (B) Enterocyte copper concentrations ( $\mu\text{mol/L}$ ) were measured in isolated enterocytes of *Commd1<sup>ΔIEC</sup>* mice (water control: n=4, copper treated: n=3) and corresponding floxed control animals (water control: n=4, copper treated: n=8) at the conclusion of the high copper diet treatment depicted in (A). Results for individual mice are plotted along with the mean and s.e.m. for each group; \* $P < 0.05$ , \*\*\*\* $P < 0.0001$  and ns, not significant (unpaired two-tailed t test). (C) Same analysis as in (B) but for *Commd9<sup>ΔIEC</sup>* (water control: n=6, copper treated: n=8) the corresponding littermate controls (water control: n=7, copper treated: n=7). \* $P < 0.05$ , \*\* $P < 0.01$  and ns, not significant (unpaired two-tailed t test) (D) Hepatic copper concentrations were measured in dried liver tissue of *Commd1<sup>fl/fl</sup>* animals on a water (n=4) or high copper diet (n=7). Results for individual mice are plotted along with the mean and s.e.m. for each group; ns, not significant (unpaired two-tailed t test). (E) Same analysis as in (D) but for *Commd9<sup>fl/fl</sup>* animals on a water (n=7) or high copper diet (n=9). (F) Schematic depicting tetrathiomolybdate (TTM) treatment course. (G) Ceruloplasmin levels (mU/mL) were measured in plasma of *Commd1<sup>ΔIEC</sup>* mice (water control: n=7, TTM treated: n=5) and corresponding floxed control animals (water control: n=6, TTM treated: n=8) on TTM or control (water) diets. Results for individual mice are plotted along with the mean and s.e.m. for each group; \* $P < 0.05$ , and ns, not significant (unpaired two-tailed t test). (H) Same analysis as in (G) but for *Commd9<sup>ΔIEC</sup>* mice (water control: n=6, TTM treated: n=7) and corresponding floxed animals (water control: n=7, TTM treated: n=6). \*\* $P < 0.01$  and ns, not significant (unpaired two-tailed t test).
